# Supplementary material for: Transcriptomic Analysis of Neuropeptides and Peptide Hormones in the Barnacle Balanus amphitrite: Evidence of Roles in Larval Settlement
Source: PubMed Central journal article supplement (PMC3462748; doi:10.1371/journal.pone.0046513), 2012-10-02
Supplement: pone.0046513.s001.pdf [file pone.0046513.s001.pdf]

**Table S1.** Mature neuropeptides/peptide hormones predicted from *Balanus amphitrite*.

| Peptide name      | Predicted mature peptide                                                                                                     |
|-------------------|------------------------------------------------------------------------------------------------------------------------------|
| ASTA-1            | DRTYGFGLa                                                                                                                    |
| ASTA-2            | DQNRPYRAYGFGLa                                                                                                               |
| ASTA-3            | GRPYSTYGFGLa                                                                                                                 |
| ASTA-4            | ERTYGFGLa                                                                                                                    |
| ASTA-5            | ERTYGFGLa                                                                                                                    |
| ASTA-6            | QPSYAFGLa                                                                                                                    |
| ASTA-7            | PSASQYAFGLa                                                                                                                  |
| ASTA-8            | PTYGFGLa                                                                                                                     |
| ASTA-9            | PSYGFGLa                                                                                                                     |
| ASTA-PRP1         | KQLGQDHQLATDLLDDNYDDTY(SOH)DLEPDGEDVE                                                                                        |
| ASTA-PRP2         | NGHDDIPN                                                                                                                     |
| ASTA-PRP3         | SWSWFEGPTRDVL                                                                                                                |
| ASTA-PRP4         | SAPAGVDEDLDDPDTALLLMTAARDLADGEVKSPAGRHRIGSDSGQTHTKPEDVSSQEKGVRFQL                                                            |
| ASTB-1            | DWNALHGNWa                                                                                                                   |
| ASTB-2            | KWNSFTGSWa                                                                                                                   |
| ASTB-3            | GAKWNGFAGSWa                                                                                                                 |
| ASTB-4            | SKWNDMGPSWa                                                                                                                  |
| ASTB-5            | AKWENFGGSWa                                                                                                                  |
| ASTB-6            | AKWDNFGGSWa                                                                                                                  |
| ASTB-7            | KNWDFNGAWa                                                                                                                   |
| ASTB-8            | KGWDSFSGGSWa                                                                                                                 |
| ASTB-9            | SAWNDFSGGSWa                                                                                                                 |
| ASTB-10           | RKDWTQLNGMWa                                                                                                                 |
| ASTB-PRP1         | DPSEVTGDPEDDRELMREVANGLVLSAYEPED                                                                                             |
| ASTB-PRP2         | SKWDDIDDDSL                                                                                                                  |
| ASTB-PRP3         | SVSTPELQEAADRLEKFIIVSHYEPSPEVEVSSGETQA                                                                                       |
| ASTB-PRP4         | SSSKALLLA                                                                                                                    |
| ASTC              | SYWKQCSFNAVSCFGa                                                                                                             |
| ASTC-PRP1         | KSLQKDVVFPQYDAEDHKLDVMPDDGTAETALLNYLARQML                                                                                    |
| ASTC-PRP2         | LSSNLDVTELQR                                                                                                                 |
| SIFamide          | GYRKPTFNNGSIFa                                                                                                               |
| Bursicon $\alpha$ | DECKLTPVVHVLQYPGCVPKPIPSYACVGHCTSYVQVSGSKLWQTERSCMCQESGQREASVSIFCPKAKQS<br>DQKFRKIVTRAPVECMCRPCTQAEESKAIPQEVAGFVSGGMSLESMPFV |
| Bursicon $\beta$  | ARPQCETIPSTIHKDEFSSSQGLERTCEGDIPVKNKCEGTCSQVQPSVISPSGFNKECSCKETGLRVREITLT<br>RCFNPDGQQVAGDQGRLLTVKLRPEPDCRCSRCEEN            |
| Calci-A           | GFDGFLGRGFSASQAAKHKMGLEAAEFPSGPa                                                                                             |
| Calci-B           | GLDFGLGRGFSGSQAAKHMMGLAAANFAGGPa                                                                                             |
| EH                | SIGSCVRNCGQCKSMYGRFFQGTACADACLAGNEGPDYCNPSMVSRL                                                                              |
| PDH               | NSELINSLGLPKIMNEAa                                                                                                           |
| Sulf-1            | ALDYGHRLFa                                                                                                                   |
| Sulf-2            | NPDY <sub>(SOH)</sub> GMMKFa                                                                                                 |
| Sulf-3            | SPDY <sub>(SOH)</sub> GFMKFa                                                                                                 |
| Sulf-4            | SPDYGFMKFa                                                                                                                   |
| Sulf-PRP1         | ADQEHFISSARVGPLFEDFEPDLYDYED                                                                                                 |
| Sulf-PRP2         | TASLASAGESGGQLADA                                                                                                            |
| Sulf-PRP3         | RAAKSAGRS                                                                                                                    |
| TRP-1             | PHTGFLGMRa                                                                                                                   |
| TRP-2             | APSGFAGMRa                                                                                                                   |
| TRP-3             | VPSGFGGMRa                                                                                                                   |
| TRP-4             | APQNSFLGLRa                                                                                                                  |
| TRP-PRP1          | SAPAPTELQLPSVTLRQPLPGQLPSPQQLQLFRAAGPYSRQLAARIAD                                                                             |
| TRP-PRP2          | EELGARGSEHDLE                                                                                                                |
| TRP-PRP3          | ADVVEGGEH                                                                                                                    |
| TRP-PRP4          | EEQGHP                                                                                                                       |
| Orco-1            | NFDEIDRSGFSGFA                                                                                                               |
| Orco-2            | NFDEIDRSGFTGFA                                                                                                               |
| Orco-3            | NFDEIDRSGFSGFV                                                                                                               |
| Orco-PRP1         | RPYKDQQLSDRGIDSLGGGHLLRGIDSLGGGHLLRGIDSLGGGHLLRGIDSLGGGHLLRGIDSLGGGHLLRE<br>ADSQGG                                           |
| Orco-PRP2         | HLSNVYTQRLIDYNSHPEAYD                                                                                                        |
| Orco-PRP3         | ALDPLSGVSGFVE                                                                                                                |
| Orco-PRP4         | LDLSGMTFGLE                                                                                                                  |
| Orco-PRP5         | PQSSSVQ                                                                                                                      |
| Orco-PRP6         | EAPAKEKL                                                                                                                     |
| IRP               | PVDKRGPMHFHFCGSLADALEMVCEFGMGKRSRTAPRQNLRLPEFSGGHLSTSSASTMPYYQTLYQSADS<br>RTRKSPGIVEECLNPCTLSTLAQYC                          |
| NPF               | SEPRDLRSAGSGEMLSGDIDNYLSELKDFYTKVGRPRFa                                                                                      |

Abbreviations: "PRP" is the briefing of precursor-related peptide; "a" represents the C-terminal glycine that will be amidated during post-translational modification. (SOH) marks the amino acid residues that will be sulfidated.
