# Supplementary material for: Transcriptomic Analysis of Neuropeptides and Peptide Hormones in the Barnacle Balanus amphitrite: Evidence of Roles in Larval Settlement
Source: PubMed Central journal article supplement (PMC3462748; doi:10.1371/journal.pone.0046513), 2012-10-02
Supplement: pone.0046513.s002.pdf [file pone.0046513.s002.pdf]

## Bursicon-alpha

|     |     |     |     |     |     |     |     |     |     |     |     |     |     |     |     |     |
|-----|-----|-----|-----|-----|-----|-----|-----|-----|-----|-----|-----|-----|-----|-----|-----|-----|
| 1   | ATG | AGC | TGG | TGC | CTG | GTT | CTG | GTG | GCC | GCG | CTG | ACG | GTG | GCC | GCC | 45  |
| 1   | M   | S   | W   | C   | L   | V   | L   | V   | A   | A   | L   | T   | V   | A   | A   | 15  |
| 46  | TCG | CGG | CTG | GCG | CTC | ACC | GGC | GCC | GAT | GAG | TGC | AAA | CTG | ACG | CCG | 90  |
| 16  | S   | R   | L   | A   | L   | T   | G   | A   | D   | E   | C   | K   | L   | T   | P   | 30  |
| 91  | GTC | GTG | CAC | GTG | CTC | CAG | TAC | CCG | GGC | TGT | GTG | CCC | AAG | CCG | ATT | 135 |
| 31  | V   | V   | H   | V   | L   | Q   | Y   | P   | G   | C   | V   | P   | K   | P   | I   | 45  |
| 136 | CCG | TCG | TAC | GCC | TGC | GTC | GGC | CAC | TGC | ACC | AGC | TAT | GTG | CAG | GTC | 180 |
| 46  | P   | S   | Y   | A   | C   | V   | G   | H   | C   | T   | S   | Y   | V   | Q   | V   | 60  |
| 181 | TCC | GGC | AGC | AAA | CTG | TGG | CAA | ACG | GAG | CGC | TCC | TGC | ATG | TGC | TGC | 225 |
| 61  | S   | G   | S   | K   | L   | W   | Q   | T   | E   | R   | S   | C   | M   | C   | C   | 75  |
| 226 | CAA | GAG | AGT | GGC | CAG | CGA | GAG | GCC | TCC | GTC | TCA | ATC | TTC | TGC | CCC | 270 |
| 76  | Q   | E   | S   | G   | Q   | R   | E   | A   | S   | V   | S   | I   | F   | C   | P   | 90  |
| 271 | AAG | GCC | AAA | CAA | AGC | GAC | CAA | AAG | TTC | CGA | AAG | ATC | GTG | ACC | CGG | 315 |
| 91  | K   | A   | K   | Q   | S   | D   | Q   | K   | F   | R   | K   | I   | V   | T   | R   | 105 |
| 316 | GCG | CCG | GTC | GAG | TGC | ATG | TGC | CGG | CCG | TGC | ACC | CAG | GCC | GAG | GAG | 360 |
| 106 | A   | P   | V   | E   | C   | M   | C   | R   | P   | C   | T   | Q   | A   | E   | E   | 120 |
| 361 | AGC | AAG | GCC | ATC | CCG | CAG | GAG | GTG | GCC | GGC | TTC | GTC | TCC | GGC | GGT | 405 |
| 121 | S   | K   | A   | I   | P   | Q   | E   | V   | A   | G   | F   | V   | S   | G   | G   | 135 |
| 406 | ATG | TCG | CTC | GAG | TCG | ATG | CCG | TTC | GTC | TGA |     |     |     |     |     | 435 |
| 136 | M   | S   | L   | E   | S   | M   | P   | F   | V   | *   |     |     |     |     |     |     |

## Bursicon-beta

|     |     |     |     |     |     |     |     |     |     |     |     |     |     |     |     |     |
|-----|-----|-----|-----|-----|-----|-----|-----|-----|-----|-----|-----|-----|-----|-----|-----|-----|
| 1   | ATG | GCC | CGC | CTC | CGC | GCC | GCC | GGC | CTG | CTG | CTA | GCG | CTG | CTG | ACC | 45  |
| 1   | M   | A   | R   | L   | R   | A   | A   | G   | L   | L   | L   | A   | L   | L   | T   | 15  |
| 46  | GTC | AGC | GGC | TGC | CGC | GCT | GCC | CGG | CCG | CAG | TGT | GAG | ACC | ATC | CCC | 90  |
| 16  | V   | S   | G   | C   | R   | A   | A   | R   | P   | Q   | C   | E   | T   | I   | P   | 30  |
| 91  | TCG | ACC | ATA | CAC | ATC | ACC | AAA | GAT | GAG | TTC | AGC | TCC | TCT | GGC | CAG | 135 |
| 31  | S   | T   | I   | H   | I   | T   | K   | D   | E   | F   | S   | S   | S   | G   | Q   | 45  |
| 136 | CTG | GAG | CGG | ACG | TGC | GAG | GGC | GAC | ATT | CCT | GTC | AAC | AAG | TGC | GAA | 180 |
| 46  | L   | E   | R   | T   | C   | E   | G   | D   | I   | P   | V   | N   | K   | C   | E   | 60  |
| 181 | GGC | ACG | TGC | AGC | TCC | CAG | GTG | CAG | CCG | TCG | GTC | ATC | TCG | CCG | TCC | 225 |
| 61  | G   | T   | C   | S   | S   | Q   | V   | Q   | P   | S   | V   | I   | S   | P   | S   | 75  |
| 226 | GGC | TTC | AAT | AAG | GAG | TGC | AGC | TGC | TGT | AAG | GAG | ACC | GGT | CTG | CGC | 270 |
| 76  | G   | F   | N   | K   | E   | C   | S   | C   | C   | K   | E   | T   | G   | L   | R   | 90  |
| 271 | GTG | CGC | GAG | ATC | ACG | CTG | ACG | CGC | TGC | TTC | AAC | CCG | GAC | GGT | CAG | 315 |
| 91  | V   | R   | E   | I   | T   | L   | T   | R   | C   | F   | N   | P   | D   | G   | Q   | 105 |
| 316 | CAG | GTG | GCC | GGC | GAC | CAG | GGC | CGG | CTG | ACG | GTC | AAA | CTG | CGC | GAG | 360 |
| 106 | Q   | V   | A   | G   | D   | Q   | G   | R   | L   | T   | V   | K   | L   | R   | E   | 120 |
| 361 | CCC | TCC | GAC | TGC | CGC | TGT | TCG | CGC | TGT | GAA | AAC | TAG |     |     |     | 396 |
| 121 | P   | S   | D   | C   | R   | C   | S   | R   | C   | E   | N   | *   |     |     |     |     |

## Calcitonin-like diuretic hormone A

```

1   ATG GTG CGG CAC GTG ACT GGG CTG GGA GCA GTG GCC GCG CTG GCC 45
1   M  V  R  H  V  T  G  L  G  A  V  A  A  L  A  15
46  GCG CTC GTC TGC TTC GCA CTC TGC TGG GTC TCA GCC TCT GCC GCC 90
16  A  L  V  C  F  A  L  C  W  V  S  A  S  A  A  30
91  AGT CTC CAC CTG GAC GAT GGA GAA AGA AAA CCA TGG ATG GAC GAA 135
31  S  L  H  L  D  D  G  E  R  K  P  W  M  D  E  45
136 ATG GAG GCC AAC CTA CAG AAC GAC CTC TAC CTG AGC GAG CTG GTC 180
46  M  E  A  N  L  Q  N  D  L  Y  L  S  E  L  V  60
181 AGC CGG CTG CGC GCG CTC AAC GAC GCC GAG GTG GCC GGA CTC GCC 225
61  S  R  L  R  A  L  N  D  A  E  V  A  G  L  A  75
226 CAC AAG CGC GGT TTT GAC TTC GGC CTG GGC CGC GGA TTT TCG GCC 270
76  H  K  R  G  F  D  F  G  L  G  R  G  F  S  A  90
271 TCC CAG GCC GCC AAG CAC AAG ATG GGT CTG GAG GCG GCT GAG TTC 315
91  S  Q  A  A  K  H  K  M  G  L  E  A  A  E  F  105
316 CCC AGC GGC CCC GGA CGC AGG CGG CGC TCC CTG GAG CAA GAC CTG 360
106 P  S  G  P  G  R  R  R  R  S  L  E  Q  D  L  120
361 AGG CAC TAG 369
121 R  H  *

```

## Calcitonin-like diuretic hormone B

```

1   ATG TGC CGC TCT GCG CTG CTG TCC GGC GGT GTG ACC GTG TTC CTC 45
1   M  C  R  S  A  L  L  S  G  G  V  T  V  F  L  15
46  GTC GCC CTG GTC CTC TGC ACA CTG TCA CTC TGC TCA GCG GCC AGC 90
16  V  A  L  V  L  C  T  L  S  L  C  S  A  A  S  30
91  CTA CAG GTC AAC GAT GGA CTT GAA AGG AAG CCG TGG ATG GAT GCG 135
31  L  Q  V  N  D  G  L  E  R  K  P  W  M  D  A  45
136 GTA CAG CGA GAA CTG CCC AGT GAC GCC TAC ATG ACC GAG TTT ATC 180
46  V  Q  R  E  L  P  S  D  A  Y  M  T  E  F  I  60
181 GCC CGG CTG CGA GCG CTC AAA GAC GCC GAG GAC ATC GGG CTT GCA 225
61  A  R  L  R  A  L  K  D  A  E  D  I  G  L  A  75
226 CAG AAG CGC GGA CTG GAC TTC GGC CTG GGA CGC GGC TTC TCC GGC 270
76  Q  K  R  G  L  D  F  G  L  G  R  G  F  S  G  90
271 AGC CAG GCG GCG AAG CAC ATG ATG GGA CTG GCG GCG GCC AAC TTC 315
91  S  Q  A  A  K  H  M  M  G  L  A  A  A  N  F  105
316 GCC GGC GGT CCG GGC CGG CGG CGG CGG TCA GCC CCT CTG CCG ACG 360
106 A  G  G  P  G  R  R  R  R  S  A  P  L  P  T  120
361 CTC CAC TAG 369
121 L  H  *

```

## Eclosion hormone

```
1   ATG AAC AGG ACC GAG TCG CTG CTG GTG CTC TGC GGC GCG ATT GTC   45
1   M  N  R  T  E  S  L  L  V  L  C  G  A  I  V   15
46  GTC CTC CTG CTG AGC GGC CCG GCC CAG GCC AGC ATC GGC TCT TGT   90
16  V  L  L  L  S  G  P  A  Q  A  S  I  G  S  C   30
91  GTC CGA AAC TGC GGC CAG TGC AAG AGC ATG TAC GGC CGG TTC TTC  135
31  V  R  N  C  G  Q  C  K  S  M  Y  G  R  F  F   45
136 CAG GGC ACC GCC TGT GCG GAC GCC TGT CTG GCC GGG AAT GAG GGC  180
46  Q  G  T  A  C  A  D  A  C  L  A  G  N  E  G   60
181 CCC GAC TGC TAC AAC CCC TCG ATG GTC TCG CGC TTT CTG AAG CGG  225
61  P  D  C  Y  N  P  S  M  V  S  R  F  L  K  R   75
226 CGA GCC TCG CCG GTG GTC CCC GCG TCC CCC GGG CTG GCG TCC CTC  270
76  R  A  S  P  V  V  P  A  S  P  G  L  A  S  L   90
271 GGC GGC AGT ACG AGT ACT ACA GCG TGG ACG GCC AGC CGG CAG AGG  315
91  G  G  S  T  S  T  T  A  W  T  A  S  R  Q  R   105
316 TGC CCA TTT CCG GCA GCT CGG CTC TCT TCA GAA TGC TCT CAG CTC  360
106 C  P  F  P  A  A  R  L  S  S  E  C  S  Q  L   120
361 GAG GAG TGG AGG CGC GGA AGT ACG CCC CGG CGA GCT CTG CAC CTC  405
121 E  E  W  R  R  G  S  T  P  R  R  A  L  H  L   135
406 CAT TAC GCA TTT CCC ATC GTG AAC TGA   432
136 H  Y  A  F  P  I  V  N  *   *
```

## Insulin-related peptide

```
1   ATG GCG CAG CTG CGA CAC GTC CTC TTC ATG ATG CTG CTC GGA GCC   45
1   M  A  Q  L  R  H  V  L  F  M  M  L  L  G  A   15
46  GTT TCC ACG GAC ATT GCA TCG GGT TCC AGC AGC TGG AAG CGG CCC   90
16  V  S  T  D  I  A  S  G  S  S  S  W  K  R  P   30
91  GTC GAC AAG CGT GGT CCT GCG ATG CAC TTC TGC GGT CCC TCG CTG  135
31  V  D  K  R  G  P  A  M  H  F  C  G  P  S  L   45
136 GCT GAC GCC CTG GAA ATG GTG TGC GAG TTC GGA ATG GGA AAA CGG  180
46  A  D  A  L  E  M  V  C  E  F  G  M  G  K  R   60
181 TCC AGA ACC GCG CCT CGC CAG AAT CTG CTG AGG CCG GAA TTT TCT  225
61  S  R  T  A  P  R  Q  N  L  L  R  P  E  F  S   75
226 GGC GGA CAT CTC TCC ACC TCG TCT GCT TCC ACC ATG CCC TAC TAC  270
76  G  G  H  L  S  T  S  S  A  S  T  M  P  Y  Y   90
271 CAG ACG CAG CTC TAC CAG TCT GCA GAC TCC AGG ACC AAG AGG AGT  315
91  Q  T  Q  L  Y  Q  S  A  D  S  R  T  K  R  S   105
316 CCG GGC ATT GTG GAG GAA TGC TGC CTG AAT CCG TGC ACG CTG AGC  360
106 P  G  I  V  E  E  C  C  L  N  P  C  T  L  S   120
361 ACA CTA GCA CAG TAC TGC TGA   381
121 T  L  A  Q  Y  C  *   *
```

## Neuropeptide F

```
1   ATG AGG GAC AGC ATG CGA CTG GCG CTG GCA CTA CTG CTC ACG GCT   45
1   M  R  D  S  M  R  L  A  L  A  L  L  L  T  A   15
46  CTG CTG GTG CTG CCC AGA CAT CAC GTG ACC GCC TCG GAG CCA CGT   90
16  L  L  V  L  P  R  H  H  V  T  A  S  E  P  R   30
91  GAC CTG AGG TCG GCC GGC AGC GGC GAG ATG CTA TCC GGC GAC ATC  135
31  D  L  R  S  A  G  S  G  E  M  L  S  G  D  I   45
136 GAC AAC TAC CTC AGC GAG CTC AAG GAT TTC TAC ACG AAA GTC GGC  180
46  D  N  Y  L  S  E  L  K  D  F  Y  T  K  V  G   60
181 AGG CCC AGG TTC GGC AAA CGC AGC ACC CGC GTC CGG CGG TGG CGC  225
61  R  P  R  F  G  K  R  S  T  R  V  R  R  W  R   75
226 ACG GTG GCG TCA CTC GGT GAC GTC ATA CAC GAG CTG CGC TTC TGA  270
76  T  V  A  S  L  G  D  V  I  H  E  L  R  F  *   *
```

## Orcokinin

```

1   ATG GCG AGT CTG TCC TAC TCG GCT CTG CTG CTG GCC ACA GCC CTG 45
1   M  A  S  L  S  Y  S  A  L  L  L  A  T  A  L  15
46  GTG GGC CTG GAG GCG CGC CCC TAC AAG GAC CAG CAG CTA TCG GAC 90
16  V  G  L  E  A  R  P  Y  K  D  Q  Q  L  S  D  30
91  CGG GGG ATC GAC TCT CTG GGC GGC GGC CAC TTA CTC AGA GGT ATC 135
31  R  G  I  D  S  L  G  G  G  H  L  L  R  G  I  45
136 GAC TCA CTG GGC GGC GGC CAC CTG TTG AGG GGA ATC GAC TCT CTC 180
46  D  S  L  G  G  G  H  L  L  R  G  I  D  S  L  60
181 GGC GGA GGA CAC CTC CTG AGA GGA ATC GAC TCC CTG GGC GGA GGA 225
61  G  G  G  H  L  L  R  G  I  D  S  L  G  G  G  75
226 CAC CTG TTG CGA GGA ATC GAC TCT CTG GGA GGA GGA CAT CTG CTC 270
76  H  L  L  R  G  I  D  S  L  G  G  G  H  L  L  90
271 CGG GAG GCG GAC TCC CAG GGA GGA CGG CGG CAC CTC TCC AAC GTC 315
91  R  E  A  D  S  Q  G  G  R  R  H  L  S  N  V  105
316 TAC ACA CAG AGG CTG ATC GAC TAC TAC AAC AGC CAC CCG GAG GCC 360
106 Y  T  Q  R  L  I  D  Y  Y  N  S  H  P  E  A  120
361 TAT GAC CGG GAG GTG CGC GCC CTG GAC CCG CTC AGC GGC GTC TCG 405
121 Y  D  R  E  V  R  A  L  D  P  L  S  G  V  S  135
406 TTC GGT GTG GAG AAG CGG CTC GAC TCG CTC AGT GGC ATG ACC TTC 450
136 F  G  V  E  K  R  L  D  S  L  S  G  M  T  F  150
451 GGC CTG GAG AAG CGC AAC TTT GAC GAA ATC GAT CGA TCG GGC TTC 495
151 G  L  E  K  R  N  F  D  E  I  D  R  S  G  F  165
496 AGC GGC TTC GCG AAG CGC AAC TTC GAC GAG ATC GAC CGA TCT GGC 540
166 S  G  F  A  K  R  N  F  D  E  I  D  R  S  G  180
541 TTC ACT GGC TTT GCG AAG CGG CCA CAG CAG TCC AGC GTA CAA AAG 585
181 F  T  G  F  A  K  R  P  Q  Q  S  S  V  Q  K  195
586 CGC AAC TTT GAC GAA ATC GAT CGC AGC GGA TTC AGC GGT TTT GTG 630
196 R  N  F  D  E  I  D  R  S  G  F  S  G  F  V  210
631 AAG CGG GAG GCG CCG GCC AAA GAG AAA CTG TAG 663
211 K  R  E  A  P  A  K  E  K  L  *

```

## Pigment dispersing hormone

```

1   ATG AGG ACC GGT ATC GTC TGT CTG CTG CTG AGC GCG CTG GTC GCC 45
1   M  R  T  G  I  V  C  L  L  L  S  A  L  V  A  15
46  CTC GCC CTC GGC GCG CCC GAC CGG TAC TCC AGC GAC GAG CTC GAC 90
16  L  A  L  G  A  P  D  R  Y  S  S  D  E  L  D  30
91  CTG GCC ACG CGA CAG ATG ATC GGT GAG CTG GCC GGC CGA ATC CTG 135
31  L  A  T  R  Q  M  I  G  E  L  A  G  R  I  L  45
136 CGC CTG GCC CGC CCC GCC AGC GCC CTG GGC GCG CAG AAA CGC AAC 180
46  R  L  A  R  P  A  S  A  L  G  A  Q  K  R  N  60
181 TCG GAG CTC ATC AAC TCG CTG CTC GGC CTG CCC AAG ATC ATG AAC 225
61  S  E  L  I  N  S  L  L  G  L  P  K  I  M  N  75
226 GAG GCC GGC CGG TGA 240
76  E  A  G  R  *

```

## SIFamide

```

1   ATG GGC AGC CGG TGC GCA GTT CGT CGA GTG GCC GCC GTG CTG GTG 45
1   M  G  S  R  C  A  V  R  R  V  A  A  V  L  V  15
46  GTG GCG CTA GTA GCG ATG GCG CTA CTA GCG CCT CTG ACA GAG GCC 90
16  V  A  L  V  A  M  A  L  L  A  P  L  T  E  A  30
91  GGC TAC CGC AAG CCA ACA TTC AAC GGC AGC ATT TTC GGC AAA CGC 135
31  G  Y  R  K  P  T  F  N  G  S  I  F  G  K  R  45

```

|     |     |     |     |     |     |     |     |     |     |     |     |     |     |     |     |     |
|-----|-----|-----|-----|-----|-----|-----|-----|-----|-----|-----|-----|-----|-----|-----|-----|-----|
| 136 | GCA | GCC | GCC | GCG | GCC | GAA | GCG | GAA | GCA | GCC | CAG | GGC | CTG | GCC | CGC | 180 |
| 46  | A   | A   | A   | A   | A   | E   | A   | E   | A   | A   | Q   | G   | L   | A   | R   | 60  |
| 181 | ATG | TGT | GCA | GCC | GCC | TAT | ACA | GTC | TGT | GGT | TTT | CCC | GCC | GAA | TAA | 225 |
| 61  | M   | C   | A   | A   | A   | Y   | T   | V   | C   | G   | F   | P   | A   | E   | *   |     |

### Sulfakinin

|     |     |     |     |     |     |     |     |     |     |     |     |     |     |     |     |     |
|-----|-----|-----|-----|-----|-----|-----|-----|-----|-----|-----|-----|-----|-----|-----|-----|-----|
| 1   | ATG | TTG | GTC | GAG | GGC | TGT | CTA | CCT | GTG | ATC | CTG | ATG | ATA | GCC | GTG | 45  |
| 1   | M   | L   | V   | E   | G   | C   | L   | P   | V   | I   | L   | M   | I   | A   | V   | 15  |
| 46  | CTG | TCC | GGG | CGG | CAA | CAC | CTG | GTC | AGG | GCC | GAC | CAG | GAG | CAC | TTC | 90  |
| 16  | L   | S   | G   | R   | Q   | H   | L   | V   | R   | A   | D   | Q   | E   | H   | F   | 30  |
| 91  | ATC | AGT | AGC | GCG | CGC | GTC | GGA | CCC | CTG | TTC | GAG | GAC | TTT | GAG | CCA | 135 |
| 31  | I   | S   | S   | A   | R   | V   | G   | P   | L   | F   | E   | D   | F   | E   | P   | 45  |
| 136 | GAC | CTG | TAC | GAC | TAC | GAG | GAC | AAG | CGG | GCG | CTC | GAC | TAC | GGC | CAC | 180 |
| 46  | D   | L   | Y   | D   | Y   | E   | D   | K   | R   | A   | L   | D   | Y   | G   | H   | 60  |
| 181 | CTG | CGC | TTC | GGC | AAG | CGG | ACG | GCG | AGC | CTC | GCG | TCC | GCC | GGA | GAG | 225 |
| 61  | L   | R   | F   | G   | K   | R   | T   | A   | S   | L   | A   | S   | A   | G   | E   | 75  |
| 226 | TCC | GGC | GGA | CAG | CTC | GCC | GAC | GCC | AAA | CGC | AAC | CCC | GAC | TAC | GGC | 270 |
| 76  | S   | G   | G   | Q   | L   | A   | D   | A   | K   | R   | N   | P   | D   | Y   | G   | 90  |
| 271 | ATG | ATG | AAG | TTT | GGC | CGG | CGC | TCC | CCG | GAT | TAC | GGC | TTC | ATG | AAG | 315 |
| 91  | M   | M   | K   | F   | G   | R   | R   | S   | P   | D   | Y   | G   | F   | M   | K   | 105 |
| 316 | TTC | GGT | CGA | CGC | TCG | CCA | GAC | TAC | GGC | TTC | ATG | AAG | TTC | GGA | AAG | 360 |
| 106 | F   | G   | R   | R   | S   | P   | D   | Y   | G   | F   | M   | K   | F   | G   | K   | 120 |
| 361 | AGG | CGA | GCG | GCA | AAA | TCG | GCC | GGT | AGG | AGC | TGA | 393 |     |     |     |     |
| 121 | R   | R   | A   | A   | K   | S   | A   | G   | R   | S   | *   |     |     |     |     |     |

### Tachykinin-related peptide

|     |     |     |     |     |     |     |     |     |     |     |     |     |     |     |     |     |
|-----|-----|-----|-----|-----|-----|-----|-----|-----|-----|-----|-----|-----|-----|-----|-----|-----|
| 1   | ATG | CAG | AGC | GTG | TCG | CCG | CTG | CCG | CTG | CTG | GCC | CTC | AGT | CTG | CTG | 45  |
| 1   | M   | Q   | S   | V   | S   | P   | L   | P   | L   | L   | A   | L   | S   | L   | L   | 15  |
| 46  | GTG | CTG | TCT | GCC | GGT | GCC | AGC | GCC | GCC | TCG | CTG | CGC | CGG | CCC | CAC | 90  |
| 16  | V   | L   | S   | A   | G   | A   | S   | A   | A   | S   | L   | R   | R   | P   | H   | 30  |
| 91  | ACC | GGC | TTC | CTG | GGG | ATG | CGC | GGC | AAG | CGC | TCG | GCG | CCG | GCG | CCG | 135 |
| 31  | T   | G   | F   | L   | G   | M   | R   | G   | K   | R   | S   | A   | P   | A   | P   | 45  |
| 136 | ACC | GAG | CTG | CAG | CTG | CCG | TCC | GTG | ACG | CTG | CGC | CAG | CCG | CTG | CCC | 180 |
| 46  | T   | E   | L   | Q   | L   | P   | S   | V   | T   | L   | R   | Q   | P   | L   | P   | 60  |
| 181 | GGC | CAG | CTG | CCG | TCG | CCC | CAG | CAG | CTG | TTG | CAG | CTG | TTC | CGC | GCA | 225 |
| 61  | G   | Q   | L   | P   | S   | P   | Q   | Q   | L   | L   | Q   | L   | F   | R   | A   | 75  |
| 226 | GCC | GGC | CCC | TAC | AGC | CGA | CAG | CTG | GCC | GCA | CGG | ATC | GCC | GAC | AAA | 270 |
| 76  | A   | G   | P   | Y   | S   | R   | Q   | L   | A   | A   | R   | I   | A   | D   | K   | 90  |
| 271 | CGG | GCA | CCC | AGC | GGG | TTC | GCC | GGA | ATG | CGG | GGA | CGC | AAG | AGG | GAG | 315 |
| 91  | R   | A   | P   | S   | G   | F   | A   | G   | M   | R   | G   | R   | K   | R   | E   | 105 |
| 316 | GAG | CTG | GGC | GCG | CGG | GGC | AGT | GAG | GAC | CAC | CTG | GAG | AAA | CGC | GTG | 360 |
| 106 | E   | L   | G   | A   | R   | G   | S   | E   | D   | H   | L   | E   | K   | R   | V   | 120 |
| 361 | CCC | AGT | GGC | TTC | GGA | GGC | ATG | AGG | GGC | AAG | AAG | GCC | GAC | GTG | GTG | 405 |
| 121 | P   | S   | G   | F   | G   | G   | M   | R   | G   | K   | K   | A   | D   | V   | V   | 135 |
| 406 | GAG | GGA | GGG | GAG | CAC | AAG | AGG | GCG | CCG | CAA | AAC | TCC | TTC | CTC | GGA | 450 |
| 136 | E   | G   | G   | E   | H   | K   | R   | A   | P   | Q   | N   | S   | F   | L   | G   | 150 |
| 451 | CTG | AGG | GGG | AGG | AGA | GAG | GAA | CAG | GGA | CAC | CCC | TAA | 486 |     |     |     |
| 151 | L   | R   | G   | R   | R   | E   | E   | Q   | G   | H   | P   | *   |     |     |     |     |
