# Supplementary material for: Transcriptomic Analysis of Neuropeptides and Peptide Hormones in the Barnacle Balanus amphitrite: Evidence of Roles in Larval Settlement
Source: PubMed Central journal article supplement (PMC3462748; doi:10.1371/journal.pone.0046513), 2012-10-02
Supplement: pone.0046513.s003.pdf [file pone.0046513.s003.pdf]

**Table S3.** Primers used for real-time PCR amplification.

| peptide                    | Forward Primer          | Reverse Primer         |
|----------------------------|-------------------------|------------------------|
| A-type allatostatin        | CAGACGGGGAGGATGTTG      | AAACCCGTACGTACTATA     |
| B-type allatostatin        | TGATTGGTGCTGACAGAACAAA  | ATCGCCTCTGACCTGCTGGTAT |
| C-type allatostatin        | AAGAGCCTCCAGAAGGACGTGT  | GATGTTTGCCGTTAGGGATG   |
| Bursicon $\beta$           | ATTCTGTCAACAAGTGCGAA    | GCTAGTTTTCACAGCGCGAA   |
| Calcitonin-A               | AAAACCATGGATGGACGAAA    | CTCCAGACCCATCTTGTGCT   |
| Calcitonin-B               | GCCTCTCCAGAATCATGTGC    | GATGTCCTCGGGCTCTTTGA   |
| Ecdysis hormone            | CGATGGTCTCGCGCTTTCTGAA  | ATGGGAAATGCGTAATGGAG   |
| Insulin-related peptide    | CTCTCCACCTCGTCTGCTTC    | TCCATCAGCAGTACTGTGCTAG |
| Neuropeptide F             | CACTACTGCTCACGGCTCTG    | CTGCCGACTTTCGTGTAGAA   |
| Orcokinin                  | TACAAGGACCAGCAGCTATCGGA | TCCTCCTCCAGAGAGTCGATT  |
| Pigment dispersing hormone | AGCCACCATGAGGACCGGTAT   | CAGCTCACCGATCATCTGT    |
| SIFamide                   | TTGTTGACCCAAGCATATCG    | CTCAGTCTCGGGGTCAGAAG   |
| Sulfakinin                 | GACATTGGATGCAAGACAGAA   | TGAGGTGGCGCATCGTCCTTCA |
| Tachykinin-related peptide | GCCTCTCCAGAATCATGTGC    | GATGTCCTCGGGCTCTTTGA   |
